# Supplementary material for: Loss of the systemic vitamin A transporter RBPR2 affects the quantitative balance between chromophore and opsins in visual pigment synthesis
Source: PubMed Central journal article supplement — bioRxiv. 2024 Jul 11:2024.07.08.602543. Preprint. [Version 1] doi: 10.1101/2024.07.08.602543 (PMC11257425; doi:10.1101/2024.07.08.602543), 2024-07-11
Supplement: media-1.pdf [file media-1.pdf]

1 **Title: Loss of the systemic vitamin A transporter RBPR2 affects the quantitative**  
2 **balance between chromophore and opsins in visual pigment synthesis**

3 **SUPPLEMENTARY FIGURES**

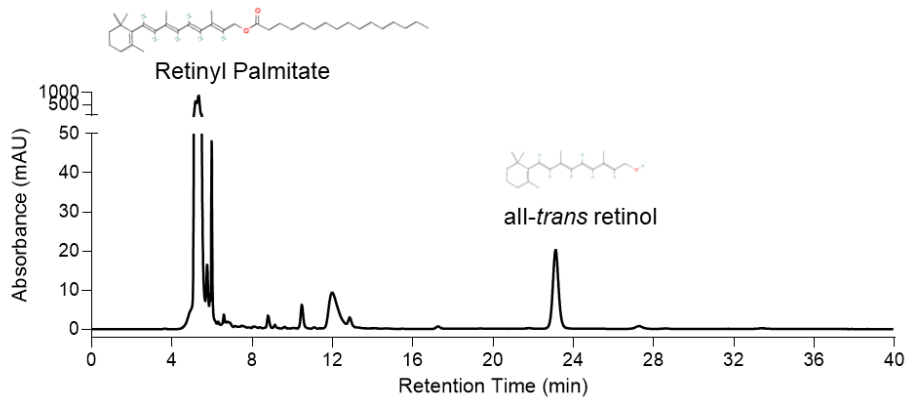

4

5 **Supplementary Figure S1: Representative HPLC chromatogram of retinoids from Wild-**  
6 **type mice liver.**

7

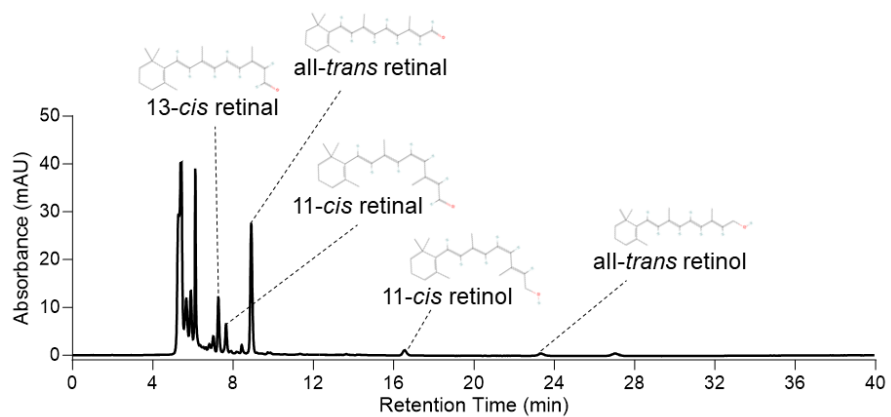

8

9 **Supplementary Figure S2:** Representative HPLC chromatogram of retinoids from wild-  
10 type mice eyes.

11

12

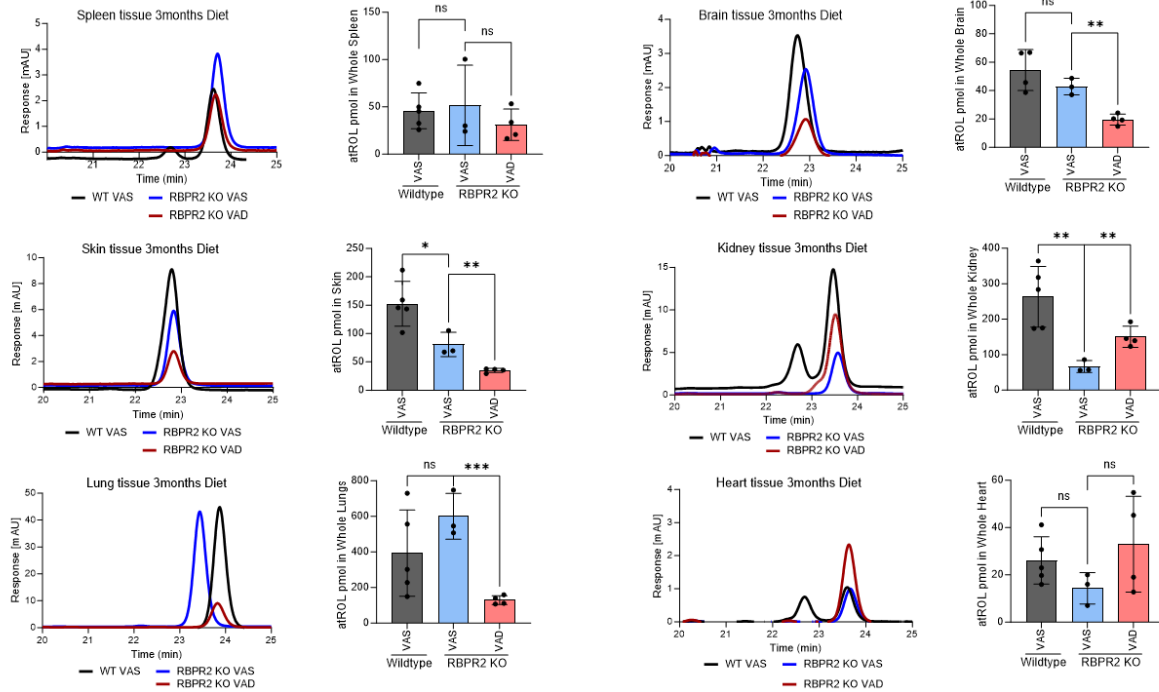

13

14 **Supplementary Figure S3: HPLC analysis and quantification of all-*trans* retinol at**  
 15 **3-months of age in various tissues.** WT and *Rbpr2*<sup>-/-</sup> mice on different vitamin A diet  
 16 showing the comparative box plots of all-*trans* retinol (atROL) in various non-ocular  
 17 tissues among the genotypes and dietary conditions. Values are presented as ±SD.  
 18 Student *t*-test, \**p*<0.05; \*\**p*<0.005; \*\*\**p*<0.001; n.s., not significant.

19

20

21

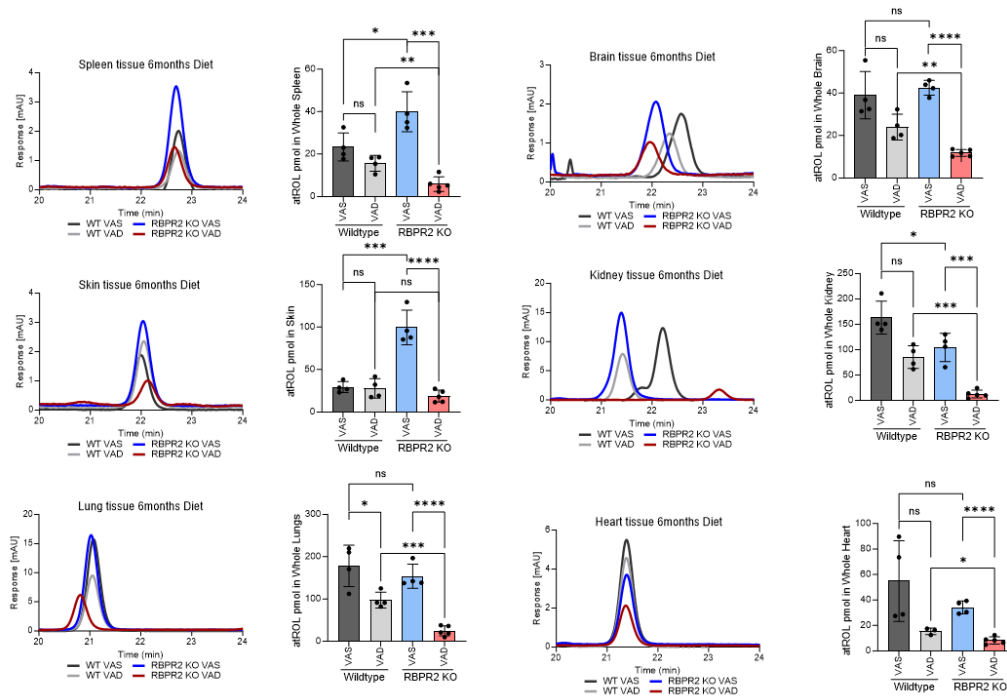

22

23 **Supplementary Figure S4: HPLC analysis and quantification of all-*trans* retinol at**  
 24 **6-months of age in various tissues. WT and *Rbpr2*<sup>-/-</sup> mice on different vitamin A diets**  
 25 **showing the comparative box plots of all-*trans* retinol (atROL) levels in various non-ocular**  
 26 **tissues among the genotypes and dietary conditions. Values are presented as ±SD.**  
 27 **Student *t*-test, \**p*<0.05; \*\**p*<0.005; \*\*\**p*<0.001; \*\*\*\**p*<0.0001.; n.s., not significant.**

28

29

30

31

32

33
